# Supplementary material for: ERp18 regulates activation of ATF6α during unfolded protein response
Source: PubMed Central journal article supplement (PMC6670016; doi:10.15252/embj.2018100990), 2019-06-17
Supplement: EMBJ-38-e100990-s001.pdf [file EMBJ-38-e100990-s001.pdf]

## Expanded View Figures

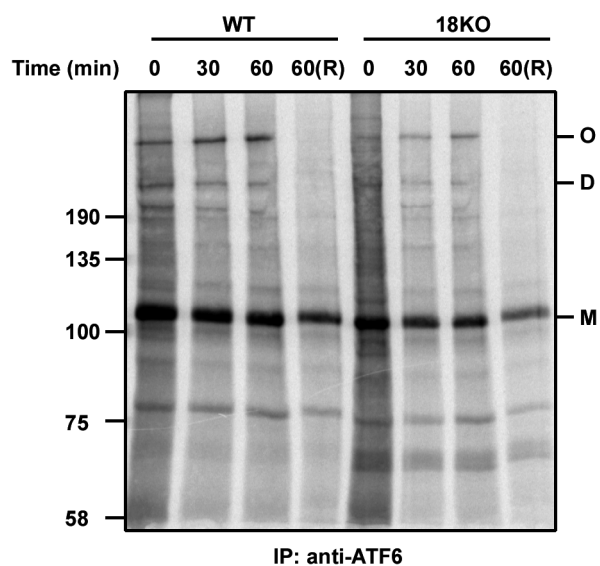

**Figure EV1. ERp18 KO does not effect ATF6alpha disulfide formation.** ATF6alpha was immunisolated using mouse anti-ATF6. Samples were separated by SDS-PAGE under non-reducing condition apart from lane 4 and 8 where they were reduced prior to separation.
